# Supplementary material
Source: Springer Nature journal article supplement (https://www.springermedizin.de/resource/supplementary/12985_2010_1049_MOESM3_ESM.pdf/9609028)

**A**

Fwt ...<sup>519</sup>EKRRNTY<sup>525</sup>SRLED<sup>542/543</sup>RRVRPTSSGD<sup>546</sup>LYYIGT  
 F<sub>Y525A</sub> ...EKRRNTASRLED<sup>542/543</sup>RRVRPTSSGD<sup>546</sup>LYYIGT  
 F<sub>Y542/543A</sub> ...EKRRNTYSRLED<sup>542/543</sup>RRVRPTSSGD<sup>546</sup>LAAIGT

Gwt 1 MPAENKKVRFENTTSDKGKIPSKVIKSY<sup>28/29</sup>YG<sup>41/42</sup>TMDIKKINEGL<sup>45</sup>LDSK ...  
 G<sub>L41/42A</sub> MPAENKKVRFENTTSDKGKIPSKVIKSY<sup>28/29</sup>YG<sup>41/42</sup>TMDIKKINEGA<sup>45</sup>ADSK ...  
 G<sub>Y28/29A</sub> MPAENKKVRFENTTSDKGKIPSKVIKSA<sup>28/29</sup>AGTMDIKKINEGL<sup>45</sup>LDSK ...

**B**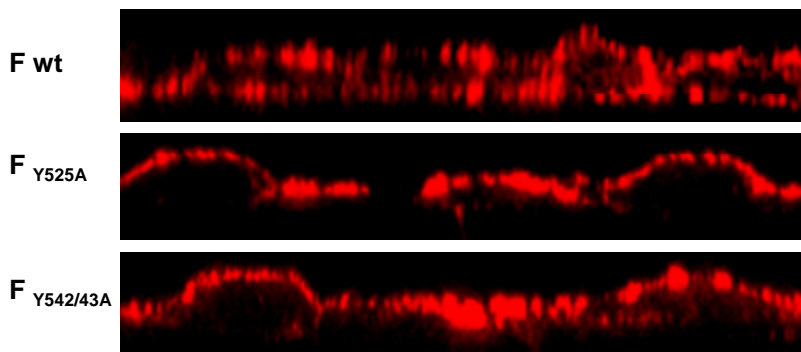**C**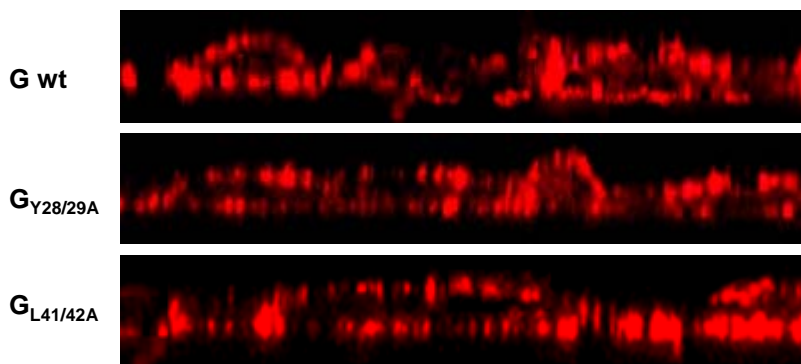**D**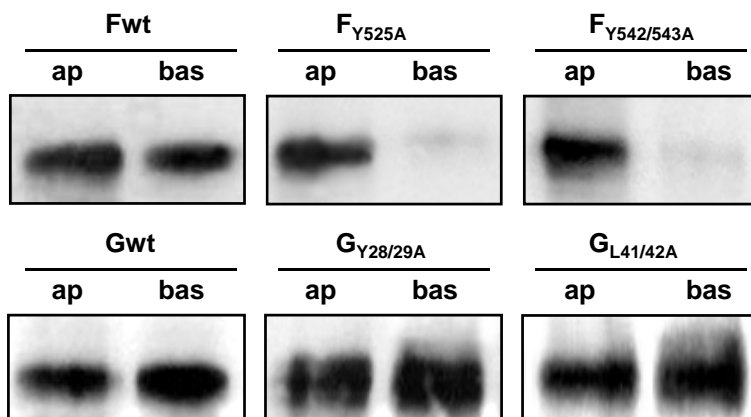

Supplement: MOESM3 [file 9609028]
